# Supplementary material
Source: PubMed Central journal article supplement (PMC7843106)
Supplement: mmc1.pdf [file mmc1.pdf]

**Molecular Cell, Volume 81**

**Supplemental information**

**Remdesivir is a delayed translocation inhibitor  
of SARS-CoV-2 replication**

**Jack P.K. Bravo, Tyler L. Dangerfield, David W. Taylor, and Kenneth A. Johnson**

## **Supplemental Information**

### **Remdesivir is a delayed translocation inhibitor of SARS CoV-2 replication**

Jack P. K. Bravo, Tyler L. Dangerfield, David W. Taylor, and Kenneth A. Johnson

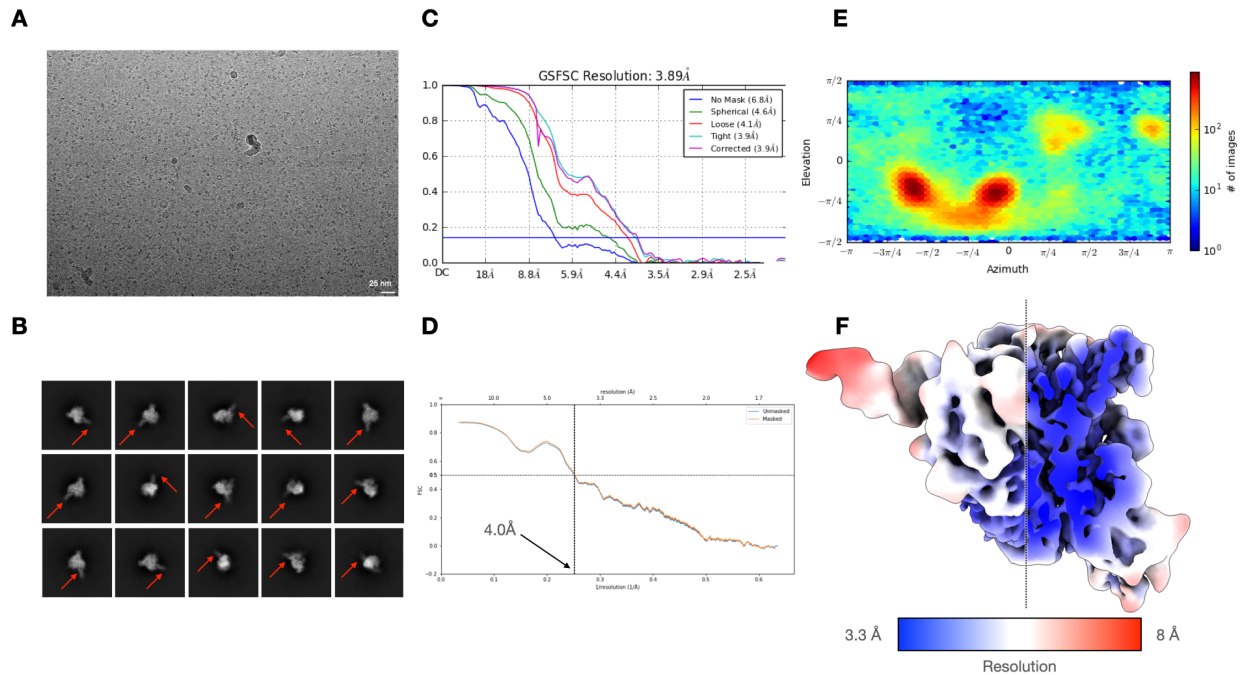

**Figure S1. Cryo-EM analysis of stalled RdRp complex. Related to Figure 2.**

(A) Representative cryo-EM micrograph of vitrified nsp7-8-12:RNA:remdesivir.

(B) Representative 2D class averages, with extended template:primer duplex denoted by red arrow.

(C) Gold-standard FSC of final reconstruction, indicating a global resolution of 3.9 Å at the 0.143 threshold.

(D) Map-to-model FSC, showing a resolution of 4.0 Å at the 0.5 threshold.

(E) Euler angle distribution of the final reconstruction.

(F) Final reconstruction filtered and colored according to local resolution. The core of the complex (including the RMP-containing active site) is at a local resolution of ~3.3 Å.
